# Supplementary material
Source: Elsevier journal article supplement (https://www.sciencedirect.com/science/article/pii/S1665268122000874)
Supplement: mmc3 [file S1665268122000874:mmc3.docx]

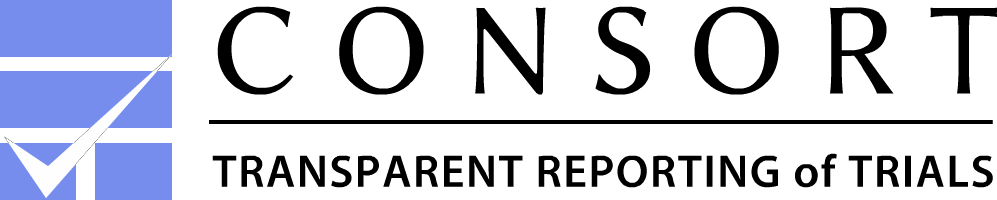


CONSORT 2010 Flow Diagram

**Enrollment**

Lost to follow-up (give reasons) (n=2)

- 1 lost contact at week 4
- 1 lost contact at week 16

Lost to follow-up (give reasons) (n=3)

- 1 lost contact at week 4
- 1 lost contact at week 8
- 1 lost contact at week 12

Discontinued intervention (give reasons) (n=0)

Analysed (n=31)

- Excluded from analysis (give reasons) (n=0)

**Analysis**

Analysed (n=29)

- Excluded from analysis (give reasons) (n=0)

Discontinued intervention (give reasons) (n=0)

Randomized (n=60)

Excluded (n=106)

- Not meeting inclusion criteria (n=84)
- Declined to participate (n=20)
- Other reasons (n=2)

Assessed for eligibility (n=166)

**Follow-Up**

Allocated to intervention (n=31)

- Received allocated intervention (n=31)
- Did not receive allocated intervention (give reasons) (n=0)

Allocated to intervention (n=29)

- Received allocated intervention (n=29)
- Did not receive allocated intervention (give reasons) (n=0)

**Allocation**
